# Supplementary material
Source: publisher figshare collection journal article supplement (https://tandf.figshare.com/articles/dataset/_/13234219)

# John River transect

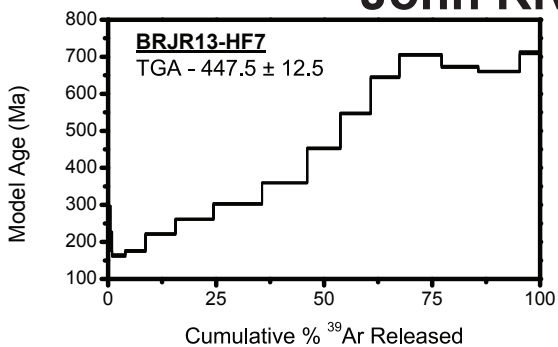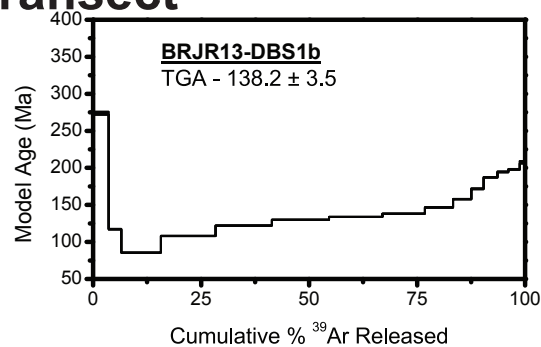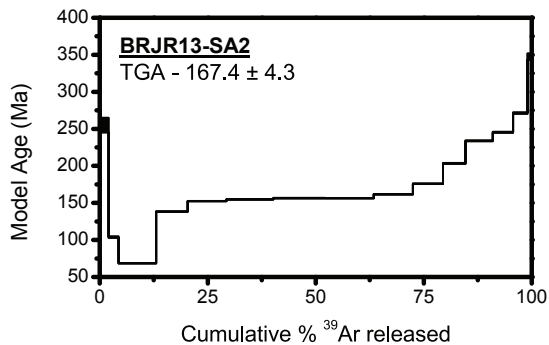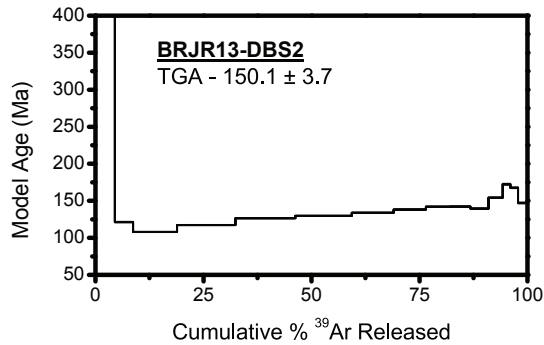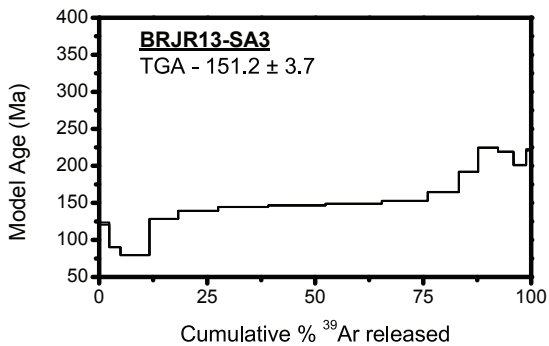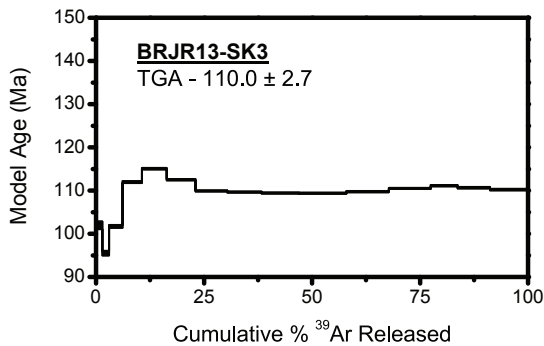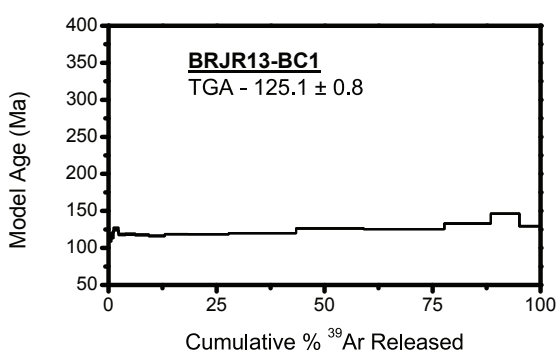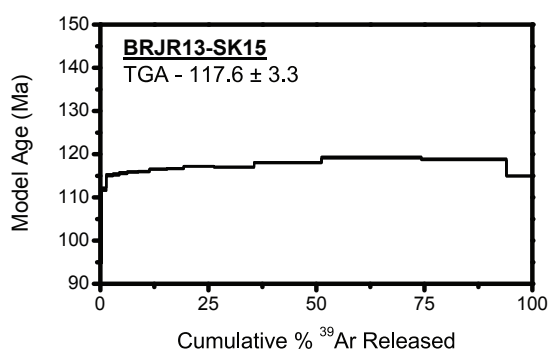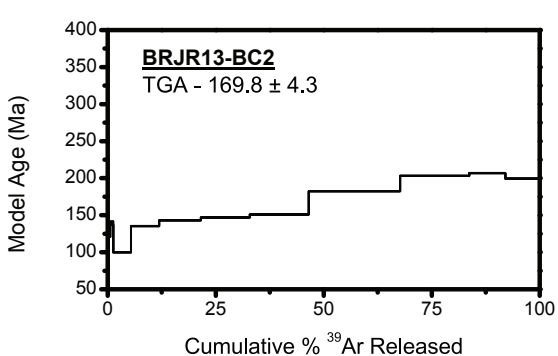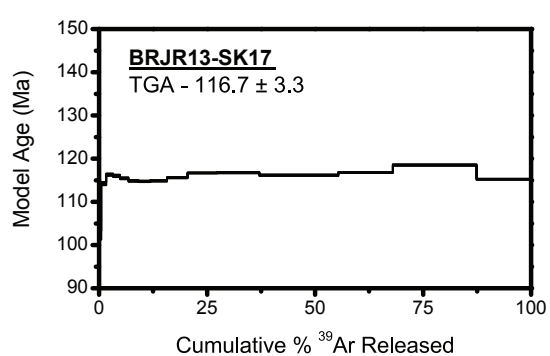

# John River transect continued

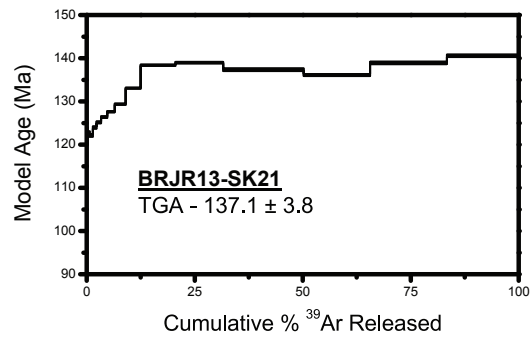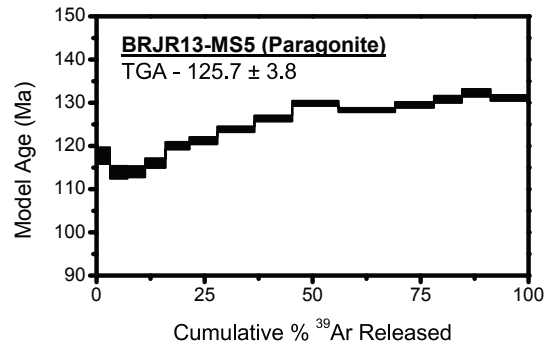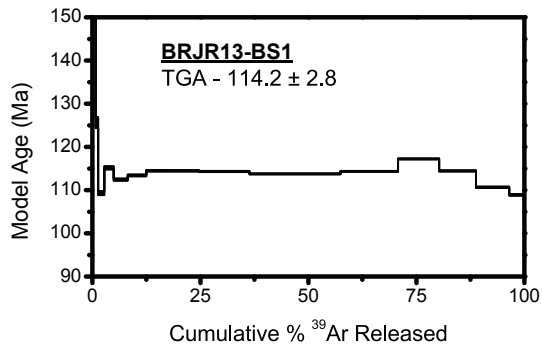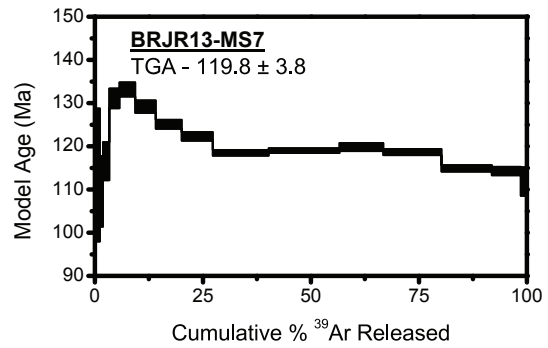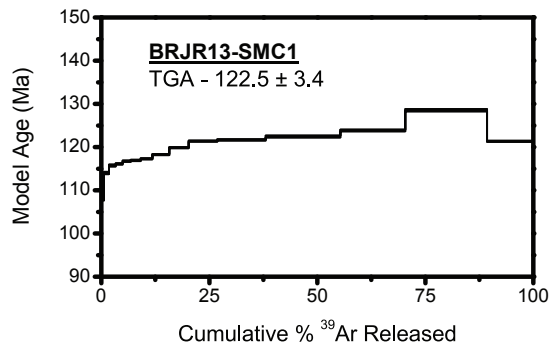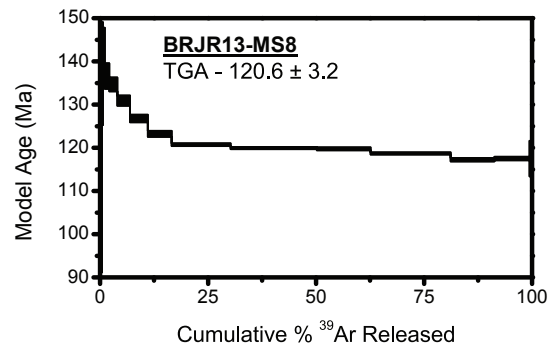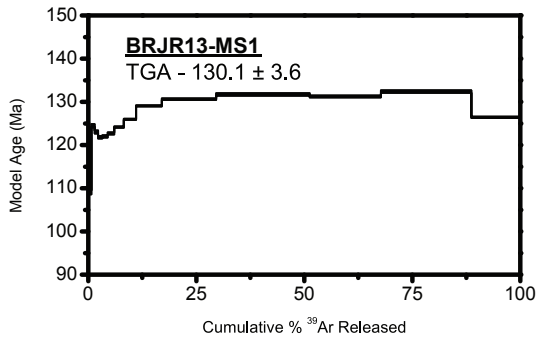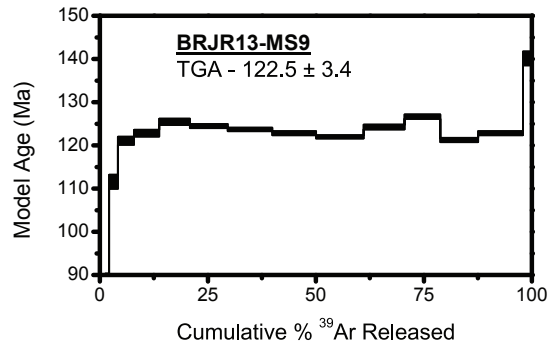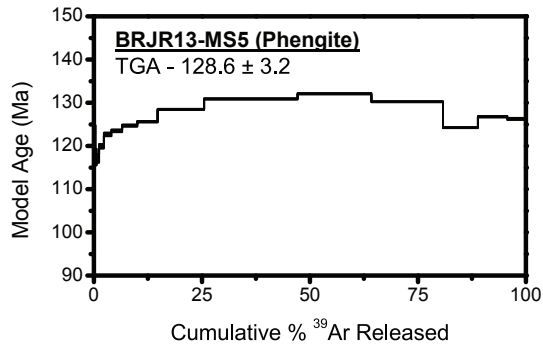

# North Fork of the Koyukuk transect

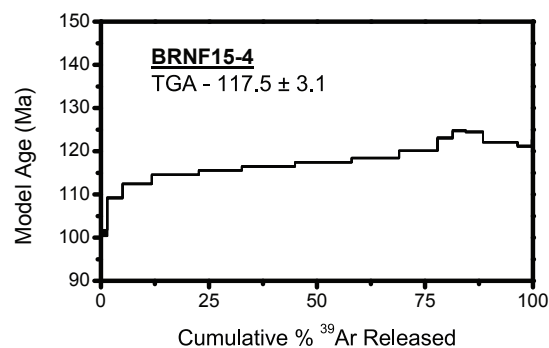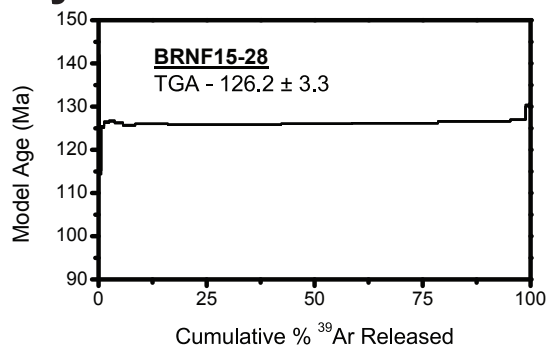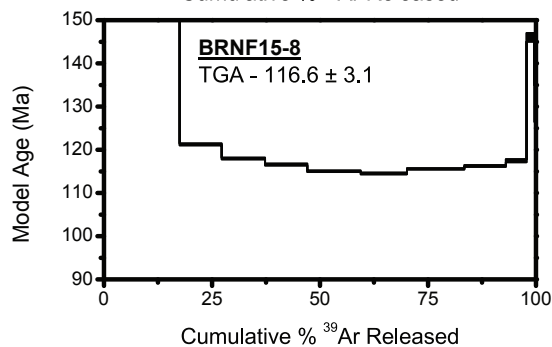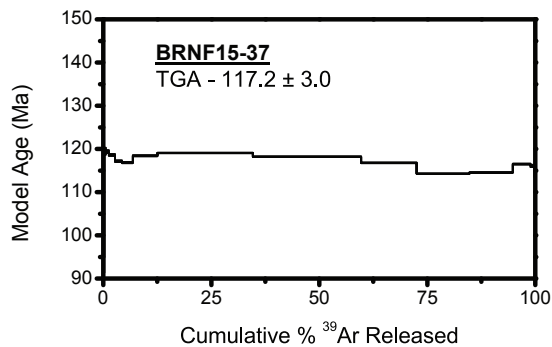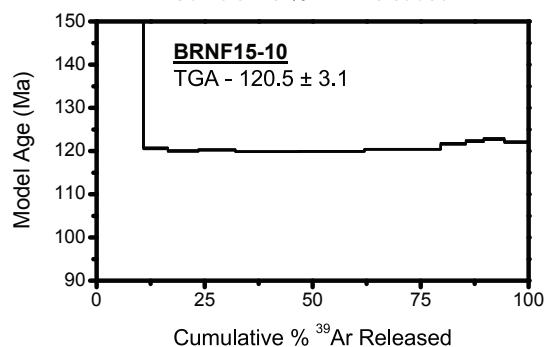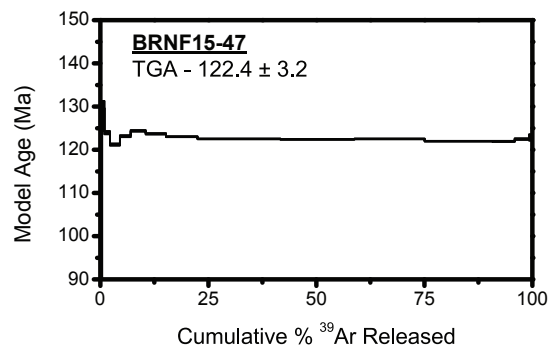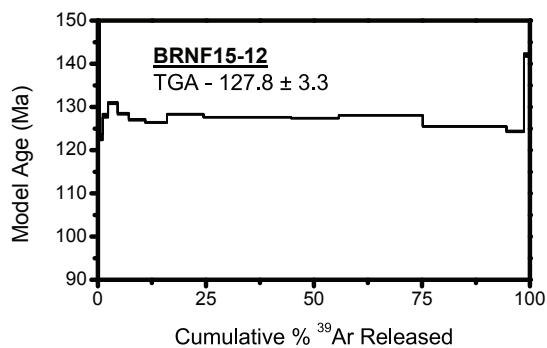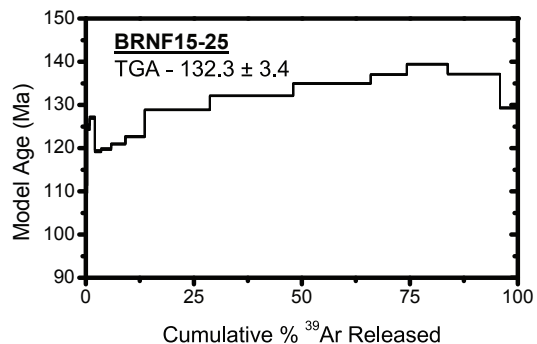

Supplement: Supplementary file 2 [file 1]
